# Supplementary material for: Assessing Antiangiogenic Therapy Response by DCE-MRI: Development of a Physiology Driven Multi-Compartment Model Using Population Pharmacometrics
Source: PLoS One. 2011 Oct 18;6(10):e26366. doi: 10.1371/journal.pone.0026366 (PMC3196562; doi:10.1371/journal.pone.0026366)
Supplement: Table S1 — THETA s of the model transfer constants in the covariate model. The THETAs of the model transfer constants in the covariate model applying vti to k T3T2 and anest to k M1C with respective 95%-CI and SE of all model parameters. (DOC) [file pone.0026366.s002.doc]

**Table S4. *THETA*s** **of the model transfer constants in the covariate model applying *vti* to *k*T3T2 and *anest* to *k*M1C with respective *95%-CI* and *SE* of all model parameters.**

| **Transfer constant** | **Population estimate**  ***THETA* [s-1]** | **Lower**  **Bound [s-1]** | **Upper**  **Bound [s-1]** | ***SE* [%] of**  ***THETA*** | ***SE* [%] of**  ***ETA*** | ***SE* [%] of**  ***ERR*(1) *ERR*(2)** | |
| --- | --- | --- | --- | --- | --- | --- | --- |
| ***k*C0 = *Cl*/*Vc*** | 0.017 | 0.015 | 0.022 | 12 | 37 | 4.1 | 4.4 |
| ***k*CM1** | 0.35 | 0.29 | 0.42 | 9 | 28 |
| ***k*M1C** | 0.01 | 0.0076 | 0.014 | 3 | 28 |
| ***k*M1M2** | 2.9 | 2.3 | 3.6 | 10 | 29 |
| ***k*M2M1** | 320 | 260 | 380 | 1 | 29 |
| ***k*M2M3** | 0.33 | 0.25 | 0.44 | 13 | 29 |
| ***k*M3M2** | 0.0021 | 0.0015 | 0.0029 | 2 | 32 |
| ***k*CL1** | 3.7 | 3 | 4.5 | 8 | 29 |
| ***k*L1C** | 0.63 | 0.52 | 0.77 | 21 | 38 |
| ***k*L1T2** | 0.033 | 0.025 | 0.044 | 4 | 34 |
| ***k*T2L1** | 0.56 | 0.44 | 0.73 | 22 | 31 |
| ***k*T2T3** | 5.9 | 3.7 | 9.3 | 13 | 27 |
| ***k*T3T2** | 0.46 | 0.46 | 0.76 | 33 | 26 |
| ***k*L1L2** | 0.0034 | 0.0028 | 0.0041 | 1 | 29 |
| ***k*L2L1** | 0.022 | 0.015 | 0.036 | 6 | 30 |
| ***k*L2L3** | 0.025 | 0.016 | 0.035 | 5 | 32 |
| ***k*L3L2** | 0.000034 | 0.0000075 | 0.00012 | 6 | 45 |
| ***C_anest*** | 1.3 | 0.97 | 1.7 | 54 |  |
| ***C*_*vti*** | 0.73 | 0.6 | 0.88 | 30 |
| *THETA* – population estimate of transfer constant  *ETA* – inter-individual variability of transfer constant  *ERR* – additive (1) and proportional (2) residual random error of the covariate model  *C_anest –* covariate to *anest* applied to *k*M1C  *C_vti -* covariate to *vti* applied to *k*T3T2 | | | | | | | |
